# Supplementary material for: Magnetic blocking in a linear iron(I) complex
Source: Springer Nature journal article supplement (doi:10.1038/nchem.1630), 2013-05-03
Supplement: 41557_2013_BFnchem1630_MOESM1_ESM.cif [file 41557_2013_BFnchem1630_MOESM1_ESM.cif]

 
data_shelxl 
 
_audit_creation_method            SHELXL-97 
_chemical_name_systematic 
; 
 ? 
; 
_chemical_name_common             [(2.2.2-Cryptand)K][Fe(C(SiMe3)3)2] 
_chemical_melting_point           ? 
_chemical_formula_moiety          'C18 H36 K N2 O6, C20 H54 Fe Si6' 
_chemical_formula_sum 
 'C38 H90 Fe K N2 O6 Si6' 
_chemical_formula_weight          934.61
 
loop_ 
 _atom_type_symbol 
 _atom_type_description 
 _atom_type_scat_dispersion_real 
 _atom_type_scat_dispersion_imag 
 _atom_type_scat_source 
 'C'  'C'   0.0033   0.0016 
 'International Tables Vol C Tables 4.2.6.8 and 6.1.1.4' 
 'H'  'H'   0.0000   0.0000 
 'International Tables Vol C Tables 4.2.6.8 and 6.1.1.4' 
 'N'  'N'   0.0061   0.0033 
 'International Tables Vol C Tables 4.2.6.8 and 6.1.1.4' 
 'O'  'O'   0.0106   0.0060 
 'International Tables Vol C Tables 4.2.6.8 and 6.1.1.4' 
 'Si'  'Si'   0.0817   0.0704 
 'International Tables Vol C Tables 4.2.6.8 and 6.1.1.4' 
 'K'  'K'   0.2009   0.2494 
 'International Tables Vol C Tables 4.2.6.8 and 6.1.1.4' 
 'Fe'  'Fe'   0.3463   0.8444 
 'International Tables Vol C Tables 4.2.6.8 and 6.1.1.4' 
 
_symmetry_cell_setting            Triclinic 
_symmetry_space_group_name_H-M    P-1 
 
loop_ 
 _symmetry_equiv_pos_as_xyz 
 'x, y, z' 
 '-x, -y, -z' 
 
_cell_length_a                    12.809(5) 
_cell_length_b                    15.271(5) 
_cell_length_c                    15.651(5) 
_cell_angle_alpha                 63.410(5) 
_cell_angle_beta                  79.118(5) 
_cell_angle_gamma                 77.807(5) 
_cell_volume                      2660.3(16) 
_cell_formula_units_Z             2 
_cell_measurement_temperature     100(2) 
_cell_measurement_reflns_used     9972 
_cell_measurement_theta_min       2.51 
_cell_measurement_theta_max       26.06
 
_exptl_crystal_description        Block 
_exptl_crystal_colour             yellow 
_exptl_crystal_size_max           0.26 
_exptl_crystal_size_mid           0.15 
_exptl_crystal_size_min           0.13 
_exptl_crystal_density_meas       ? 
_exptl_crystal_density_diffrn     1.167 
_exptl_crystal_density_method     'not measured' 
_exptl_crystal_F_000              1018 
_exptl_absorpt_coefficient_mu     0.536 
_exptl_absorpt_correction_type    multi-scan 
_exptl_absorpt_correction_T_min   0.7478 
_exptl_absorpt_correction_T_max   0.8610 
_exptl_absorpt_process_details    SADABS 
 
_exptl_special_details 
; 
 ? 
; 
 
_diffrn_ambient_temperature       100(2) 
_diffrn_radiation_wavelength      0.71069 
_diffrn_radiation_type            MoK\a 
_diffrn_radiation_source          'microfocus sealed tube' 
_diffrn_radiation_monochromator   graphite 
_diffrn_measurement_device_type   'Bruker APEX-II CCD' 
_diffrn_measurement_method        '\f and \w scans'
_diffrn_detector_area_resol_mean  8.366 
_diffrn_reflns_number             33745 
_diffrn_reflns_av_R_equivalents   0.0525 
_diffrn_reflns_av_sigmaI/netI     0.0751 
_diffrn_reflns_limit_h_min        -15 
_diffrn_reflns_limit_h_max        15 
_diffrn_reflns_limit_k_min        -18 
_diffrn_reflns_limit_k_max        17 
_diffrn_reflns_limit_l_min        -19 
_diffrn_reflns_limit_l_max        19 
_diffrn_reflns_theta_min          1.64 
_diffrn_reflns_theta_max          26.16 
_reflns_number_total              10551 
_reflns_number_gt                 7215 
_reflns_threshold_expression      >2sigma(I) 
 
_computing_data_collection        'Bruker APEX2 v. 2009.1'
_computing_cell_refinement        'Bruker APEX2 v. 2009.1'
_computing_data_reduction         'Bruker APEX2 v. 2009.1' 
_computing_structure_solution     'SHELXS-97 (Sheldrick, 2008)' 
_computing_structure_refinement   'SHELXL-97 (Sheldrick, 2008)' 
_computing_molecular_graphics     DIAMOND 
_computing_publication_material   CIFTAB 
 
_refine_special_details 
; 
 Refinement of F^2^ against ALL reflections.  The weighted R-factor wR and 
 goodness of fit S are based on F^2^, conventional R-factors R are based 
 on F, with F set to zero for negative F^2^. The threshold expression of 
 F^2^ > 2sigma(F^2^) is used only for calculating R-factors(gt) etc. and is 
 not relevant to the choice of reflections for refinement.  R-factors based 
 on F^2^ are statistically about twice as large as those based on F, and R- 
 factors based on ALL data will be even larger. 
; 
 
_refine_ls_structure_factor_coef  Fsqd  
_refine_ls_matrix_type            full 
_refine_ls_weighting_scheme       calc  
_refine_ls_weighting_details 
 'calc w=1/[\s^2^(Fo^2^)+(0.0555P)^2^+3.9992P] where P=(Fo^2^+2Fc^2^)/3' 
_atom_sites_solution_primary      direct 
_atom_sites_solution_secondary    difmap 
_atom_sites_solution_hydrogens    geom 
_refine_ls_hydrogen_treatment     constr 
_refine_ls_extinction_method      none 
_refine_ls_extinction_coef        ? 
_refine_ls_number_reflns          10551 
_refine_ls_number_parameters      481 
_refine_ls_number_restraints      89 
_refine_ls_R_factor_all           0.0967 
_refine_ls_R_factor_gt            0.0622 
_refine_ls_wR_factor_ref          0.1559 
_refine_ls_wR_factor_gt           0.1385 
_refine_ls_goodness_of_fit_ref    1.088 
_refine_ls_restrained_S_all       1.247 
_refine_ls_shift/su_max           0.001 
_refine_ls_shift/su_mean          0.000 


 
loop_ 
 _atom_site_label 
 _atom_site_type_symbol 
 _atom_site_fract_x 
 _atom_site_fract_y 
 _atom_site_fract_z 
 _atom_site_U_iso_or_equiv 
 _atom_site_adp_type 
 _atom_site_occupancy 
 _atom_site_symmetry_multiplicity 
 _atom_site_calc_flag 
 _atom_site_refinement_flags 
 _atom_site_disorder_assembly 
 _atom_site_disorder_group 
C1 C 0.7497(3) 0.3668(3) 0.8449(3) 0.0182(9) Uani 1 1 d . . . 
C2 C 1.0804(3) 0.3094(3) 0.8215(3) 0.0179(9) Uani 1 1 d . . . 
C3 C 0.7869(4) 0.1730(4) 1.0363(4) 0.0452(15) Uani 1 1 d . . . 
H3A H 0.7585 0.1125 1.0775 0.068 Uiso 1 1 calc R . . 
H3B H 0.7841 0.2110 1.0719 0.068 Uiso 1 1 calc R . . 
H3C H 0.8601 0.1581 1.0127 0.068 Uiso 1 1 calc R . . 
C4 C 0.7081(4) 0.1583(4) 0.8775(4) 0.0465(15) Uani 1 1 d . . . 
H4A H 0.6839 0.0983 0.9261 0.070 Uiso 1 1 calc R . . 
H4B H 0.7803 0.1437 0.8516 0.070 Uiso 1 1 calc R . . 
H4C H 0.6619 0.1879 0.8271 0.070 Uiso 1 1 calc R . . 
C5 C 0.5610(4) 0.2573(4) 0.9892(4) 0.0596(19) Uani 1 1 d . . . 
H5A H 0.5440 0.1926 1.0328 0.089 Uiso 1 1 calc R . . 
H5B H 0.5131 0.2876 0.9401 0.089 Uiso 1 1 calc R . . 
H5C H 0.5533 0.2973 1.0236 0.089 Uiso 1 1 calc R . . 
C6 C 0.7857(4) 0.3428(4) 0.6508(4) 0.0357(12) Uani 1 1 d . . . 
H6A H 0.7587 0.3704 0.5894 0.054 Uiso 1 1 calc R . . 
H6B H 0.7775 0.2740 0.6842 0.054 Uiso 1 1 calc R . . 
H6C H 0.8603 0.3493 0.6416 0.054 Uiso 1 1 calc R . . 
C7 C 0.5619(3) 0.4032(3) 0.7260(3) 0.0291(11) Uani 1 1 d . . . 
H7A H 0.5449 0.4268 0.6615 0.044 Uiso 1 1 calc R . . 
H7B H 0.5175 0.4433 0.7556 0.044 Uiso 1 1 calc R . . 
H7C H 0.5492 0.3358 0.7621 0.044 Uiso 1 1 calc R . . 
C8 C 0.7210(4) 0.5446(3) 0.6432(3) 0.0317(11) Uani 1 1 d . . . 
H8A H 0.6982 0.5622 0.5818 0.048 Uiso 1 1 calc R . . 
H8B H 0.7946 0.5542 0.6347 0.048 Uiso 1 1 calc R . . 
H8C H 0.6768 0.5855 0.6721 0.048 Uiso 1 1 calc R . . 
C9 C 0.5713(4) 0.5315(4) 0.8718(4) 0.0427(14) Uani 1 1 d . . . 
H9A H 0.5576 0.5798 0.8974 0.064 Uiso 1 1 calc R . . 
H9B H 0.5206 0.4854 0.9038 0.064 Uiso 1 1 calc R . . 
H9C H 0.5641 0.5639 0.8042 0.064 Uiso 1 1 calc R . . 
C10 C 0.8010(4) 0.5624(4) 0.8391(4) 0.0486(16) Uani 1 1 d . . . 
H10A H 0.7762 0.6086 0.8672 0.073 Uiso 1 1 calc R . . 
H10B H 0.7985 0.5963 0.7708 0.073 Uiso 1 1 calc R . . 
H10C H 0.8736 0.5332 0.8525 0.073 Uiso 1 1 calc R . . 
C11 C 0.7155(4) 0.4136(5) 1.0250(4) 0.0578(19) Uani 1 1 d . . . 
H11A H 0.6956 0.4674 1.0436 0.087 Uiso 1 1 calc R . . 
H11B H 0.7866 0.3816 1.0413 0.087 Uiso 1 1 calc R . . 
H11C H 0.6657 0.3669 1.0581 0.087 Uiso 1 1 calc R . . 
C12 C 1.1182(4) 0.3241(4) 0.6117(3) 0.0432(14) Uani 1 1 d . . . 
H12A H 1.1425 0.3660 0.5467 0.065 Uiso 1 1 calc R . . 
H12B H 1.0453 0.3150 0.6150 0.065 Uiso 1 1 calc R . . 
H12C H 1.1632 0.2610 0.6318 0.065 Uiso 1 1 calc R . . 
C13 C 1.0466(4) 0.5101(4) 0.6363(4) 0.0545(18) Uani 1 1 d . . . 
H13A H 1.0751 0.5428 0.5703 0.082 Uiso 1 1 calc R . . 
H13B H 1.0519 0.5478 0.6702 0.082 Uiso 1 1 calc R . . 
H13C H 0.9726 0.5044 0.6394 0.082 Uiso 1 1 calc R . . 
C14 C 1.2695(3) 0.4051(4) 0.6697(4) 0.0333(12) Uani 1 1 d . . . 
H14A H 1.2871 0.4436 0.6022 0.050 Uiso 1 1 calc R . . 
H14B H 1.3157 0.3427 0.6902 0.050 Uiso 1 1 calc R . . 
H14C H 1.2792 0.4401 0.7048 0.050 Uiso 1 1 calc R . . 
C15 C 1.1177(5) 0.4874(5) 0.8549(5) 0.066(2) Uani 1 1 d . . . 
H15A H 1.1397 0.5031 0.9011 0.099 Uiso 1 1 calc R . . 
H15B H 1.0459 0.5200 0.8415 0.099 Uiso 1 1 calc R . . 
H15C H 1.1656 0.5095 0.7966 0.099 Uiso 1 1 calc R . . 
C16 C 1.2651(4) 0.2991(5) 0.9339(4) 0.0559(18) Uani 1 1 d . . . 
H16A H 1.2813 0.3228 0.9766 0.084 Uiso 1 1 calc R . . 
H16B H 1.3132 0.3205 0.8758 0.084 Uiso 1 1 calc R . . 
H16C H 1.2735 0.2281 0.9643 0.084 Uiso 1 1 calc R . . 
C17 C 1.0357(4) 0.3166(5) 1.0240(4) 0.0487(15) Uani 1 1 d . . . 
H17A H 1.0621 0.3403 1.0621 0.073 Uiso 1 1 calc R . . 
H17B H 1.0390 0.2460 1.0571 0.073 Uiso 1 1 calc R . . 
H17C H 0.9626 0.3465 1.0137 0.073 Uiso 1 1 calc R . . 
C18 C 1.1067(4) 0.0977(4) 0.9919(4) 0.0449(15) Uani 1 1 d . . . 
H18A H 1.1279 0.0291 1.0051 0.067 Uiso 1 1 calc R . . 
H18B H 1.0336 0.1077 1.0184 0.067 Uiso 1 1 calc R . . 
H18C H 1.1526 0.1171 1.0203 0.067 Uiso 1 1 calc R . . 
C19 C 1.0401(4) 0.1177(4) 0.8121(4) 0.0414(13) Uani 1 1 d . . . 
H19A H 1.0653 0.0481 0.8349 0.062 Uiso 1 1 calc R . . 
H19B H 1.0494 0.1482 0.7431 0.062 Uiso 1 1 calc R . . 
H19C H 0.9653 0.1278 0.8342 0.062 Uiso 1 1 calc R . . 
C20 C 1.2641(4) 0.1383(4) 0.8193(4) 0.0397(13) Uani 1 1 d . . . 
H20A H 1.2790 0.0679 0.8406 0.059 Uiso 1 1 calc R . . 
H20B H 1.3100 0.1587 0.8468 0.059 Uiso 1 1 calc R . . 
H20C H 1.2768 0.1703 0.7505 0.059 Uiso 1 1 calc R . . 
C21 C 0.6081(9) -0.0589(8) 0.7835(9) 0.043(3) Uiso 0.438(6) 1 d PD A 2 
H21A H 0.6088 -0.0999 0.8520 0.051 Uiso 0.438(6) 1 calc PR A 2 
H21B H 0.5602 -0.0836 0.7611 0.051 Uiso 0.438(6) 1 calc PR A 2 
C22 C 0.5575(4) 0.0433(4) 0.7716(3) 0.0361(12) Uani 1 1 d D . . 
H22A H 0.4994 0.0109 0.7728 0.043 Uiso 0.562(6) 1 calc PR A 1 
H22B H 0.5324 0.0759 0.8141 0.043 Uiso 0.562(6) 1 calc PR A 1 
H22C H 0.4806 0.0446 0.7893 0.043 Uiso 0.438(6) 1 d PR A 2 
H22D H 0.5858 0.0593 0.8154 0.043 Uiso 0.438(6) 1 d PR A 2 
C23 C 0.5201(5) 0.2058(4) 0.6545(4) 0.0514(16) Uani 1 1 d . . . 
H23A H 0.5352 0.2313 0.6969 0.062 Uiso 1 1 calc R A . 
H23B H 0.4446 0.1982 0.6693 0.062 Uiso 1 1 calc R . . 
C24 C 0.5326(6) 0.2796(4) 0.5613(4) 0.0612(19) Uani 1 1 d . A . 
H24A H 0.4615 0.3138 0.5440 0.073 Uiso 1 1 calc R . . 
H24B H 0.5711 0.3270 0.5630 0.073 Uiso 1 1 calc R . . 
C25 C 0.5867(5) 0.3281(4) 0.3972(4) 0.0541(17) Uani 1 1 d D . . 
H25A H 0.5232 0.3288 0.3714 0.065 Uiso 0.483(7) 1 calc PR B 1 
H25B H 0.5781 0.3905 0.4018 0.065 Uiso 0.483(7) 1 calc PR B 1 
H25C H 0.6259 0.3781 0.3927 0.065 Uiso 0.517(7) 1 d PR B 2 
H25D H 0.5142 0.3595 0.3824 0.065 Uiso 0.517(7) 1 d PR B 2 
C26 C 0.6706(8) 0.3299(7) 0.3288(8) 0.038(3) Uiso 0.483(7) 1 d PD A 1 
H26A H 0.7211 0.3683 0.3304 0.046 Uiso 0.483(7) 1 calc PR B 1 
H26B H 0.6437 0.3643 0.2664 0.046 Uiso 0.483(7) 1 calc PR B 1 
C49 C 0.6400(7) 0.2888(7) 0.3224(6) 0.032(2) Uiso 0.517(7) 1 d PD A 2 
H49A H 0.5887 0.2553 0.3142 0.038 Uiso 0.517(7) 1 calc PR B 2 
H49B H 0.6519 0.3455 0.2616 0.038 Uiso 0.517(7) 1 calc PR B 2 
C28 C 0.8939(5) -0.0469(5) 0.7383(6) 0.067(2) Uani 1 1 d D . . 
H28A H 0.8756 -0.0092 0.7764 0.081 Uiso 0.562(6) 1 calc PR A 1 
H28B H 0.9651 -0.0836 0.7516 0.081 Uiso 0.562(6) 1 calc PR A 1 
H28C H 0.9300 -0.1113 0.7432 0.081 Uiso 0.438(6) 1 d PR A 2 
H28F H 0.9320 -0.0262 0.7726 0.081 Uiso 0.438(6) 1 d PR A 2 
C29 C 0.9751(7) 0.0770(5) 0.6098(9) 0.105(4) Uani 1 1 d . . . 
H29A H 1.0432 0.0348 0.6265 0.126 Uiso 1 1 calc R A . 
H29B H 0.9618 0.1177 0.6448 0.126 Uiso 1 1 calc R . . 
C30 C 0.9895(6) 0.1400(10) 0.5127(7) 0.124(5) Uani 1 1 d . A . 
H30A H 1.0069 0.2009 0.5080 0.149 Uiso 1 1 calc R . . 
H30B H 1.0524 0.1102 0.4845 0.149 Uiso 1 1 calc R . . 
C31 C 0.9186(6) 0.2296(6) 0.3596(5) 0.094(3) Uani 1 1 d D . . 
H31A H 0.9889 0.2100 0.3321 0.112 Uiso 0.483(7) 1 calc PR B 1 
H31B H 0.9195 0.2945 0.3560 0.112 Uiso 0.483(7) 1 calc PR B 1 
H31C H 0.9639 0.2776 0.3496 0.112 Uiso 0.517(7) 1 d PR B 2 
H31D H 0.9544 0.1923 0.3232 0.112 Uiso 0.517(7) 1 d PR B 2 
C34 C 0.6917(5) 0.0958(4) 0.3009(4) 0.0520(16) Uani 1 1 d D . . 
H34A H 0.6355 0.0773 0.2812 0.062 Uiso 0.483(7) 1 calc PR B 1 
H34B H 0.7554 0.0930 0.2570 0.062 Uiso 0.483(7) 1 calc PR B 1 
H34C H 0.6208 0.1338 0.2888 0.062 Uiso 0.517(7) 1 d PR B 2 
H34D H 0.7120 0.0635 0.2579 0.062 Uiso 0.517(7) 1 d PR B 2 
C35 C 0.6583(5) -0.0601(4) 0.4163(4) 0.0539(16) Uani 1 1 d D . . 
H35A H 0.6884 -0.0899 0.3721 0.065 Uiso 0.483(7) 1 calc PR B 1 
H35B H 0.5846 -0.0315 0.4039 0.065 Uiso 0.483(7) 1 calc PR B 1 
H35C H 0.7206 -0.0791 0.3789 0.065 Uiso 0.517(7) 1 d PR B 2 
H35D H 0.5955 -0.0628 0.3918 0.065 Uiso 0.517(7) 1 d PR B 2 
C36 C 0.6592(5) -0.1351(4) 0.5120(4) 0.0473(15) Uani 1 1 d D A . 
H36A H 0.5860 -0.1477 0.5373 0.057 Uiso 0.562(6) 1 calc PR A 1 
H36B H 0.7001 -0.1955 0.5100 0.057 Uiso 0.562(6) 1 calc PR A 1 
H36C H 0.7281 -0.1772 0.5159 0.057 Uiso 0.438(6) 1 d PR A 2 
H36D H 0.6049 -0.1753 0.5214 0.057 Uiso 0.438(6) 1 d PR A 2 
C37 C 0.6752(5) -0.1868(4) 0.6750(4) 0.0476(15) Uani 1 1 d D . . 
H37A H 0.7390 -0.2355 0.6927 0.057 Uiso 0.562(6) 1 calc PR A 1 
H37B H 0.6201 -0.2214 0.6744 0.057 Uiso 0.562(6) 1 calc PR A 1 
H37C H 0.7100 -0.2418 0.6597 0.057 Uiso 0.438(6) 1 d PR A 2 
H37D H 0.6118 -0.2078 0.7193 0.057 Uiso 0.438(6) 1 d PR A 2 
N1 N 0.7074(3) -0.0755(3) 0.7417(3) 0.0368(11) Uani 1 1 d D . . 
N2 N 0.7329(4) 0.2271(3) 0.3382(3) 0.0468(12) Uani 1 1 d D . . 
O1 O 0.9097(3) 0.1653(3) 0.4562(4) 0.0773(17) Uani 1 1 d . A . 
O2 O 0.8999(3) 0.0187(5) 0.6439(3) 0.0853(18) Uani 1 1 d . A . 
O3 O 0.5825(3) 0.2558(2) 0.4898(2) 0.0421(9) Uani 1 1 d . A . 
O4 O 0.5753(3) 0.1154(3) 0.6799(2) 0.0555(12) Uani 1 1 d . A . 
Si1 Si 0.70456(10) 0.24656(10) 0.93185(10) 0.0311(3) Uani 1 1 d . . . 
Si2 Si 0.70814(9) 0.41051(9) 0.72364(8) 0.0200(3) Uani 1 1 d . . . 
Si3 Si 0.71266(10) 0.46274(10) 0.89162(10) 0.0302(3) Uani 1 1 d . . . 
Si4 Si 1.12522(9) 0.38330(9) 0.69296(9) 0.0254(3) Uani 1 1 d . . . 
Si5 Si 1.12114(10) 0.35015(11) 0.90430(10) 0.0316(3) Uani 1 1 d . . . 
Si6 Si 1.11837(9) 0.17433(9) 0.85878(9) 0.0238(3) Uani 1 1 d . . . 
K1 K 0.72192(7) 0.07689(7) 0.54047(7) 0.0238(2) Uani 1 1 d D A . 
Fe1 Fe 0.91521(4) 0.33738(4) 0.83279(4) 0.01619(16) Uani 1 1 d . . . 
C39 C 0.6376(6) -0.1553(6) 0.7587(6) 0.026(2) Uiso 0.562(6) 1 d PD A 1 
H39A H 0.6481 -0.2117 0.8200 0.031 Uiso 0.562(6) 1 calc PR A 1 
H39B H 0.5620 -0.1279 0.7584 0.031 Uiso 0.562(6) 1 calc PR A 1 
C42 C 0.6571(9) 0.2084(7) 0.2807(8) 0.043(3) Uiso 0.483(7) 1 d PD A 1 
H42A H 0.5821 0.2207 0.3037 0.051 Uiso 0.483(7) 1 calc PR B 1 
H42B H 0.6679 0.2508 0.2125 0.051 Uiso 0.483(7) 1 calc PR B 1 
C44 C 0.8102(6) -0.1266(6) 0.7765(6) 0.025(2) Uiso 0.562(6) 1 d PD A 1 
H44A H 0.8375 -0.1772 0.7532 0.030 Uiso 0.562(6) 1 calc PR A 1 
H44B H 0.8019 -0.1584 0.8462 0.030 Uiso 0.562(6) 1 calc PR A 1 
O8 O 0.7006(7) -0.1151(5) 0.5739(5) 0.049(2) Uiso 0.562(6) 1 d PD A 1 
C46 C 0.6454(6) -0.0321(6) 0.8114(5) 0.0231(19) Uiso 0.562(6) 1 d PD A 1 
H46A H 0.6180 -0.0850 0.8693 0.028 Uiso 0.562(6) 1 calc PR A 1 
H46B H 0.6945 -0.0045 0.8295 0.028 Uiso 0.562(6) 1 calc PR A 1 
C40 C 0.7518(9) -0.1686(8) 0.7295(9) 0.047(4) Uiso 0.438(6) 1 d PD A 2 
H40A H 0.7589 -0.2241 0.7920 0.056 Uiso 0.438(6) 1 calc PR A 2 
H40B H 0.8225 -0.1627 0.6936 0.056 Uiso 0.438(6) 1 calc PR A 2 
C43 C 0.7728(7) 0.1656(7) 0.2822(7) 0.036(3) Uiso 0.517(7) 1 d PD A 2 
H43A H 0.8418 0.1269 0.3013 0.044 Uiso 0.517(7) 1 calc PR B 2 
H43B H 0.7823 0.2087 0.2141 0.044 Uiso 0.517(7) 1 calc PR B 2 
C45 C 0.7943(7) -0.0551(8) 0.7801(7) 0.030(3) Uiso 0.438(6) 1 d PD A 2 
H45A H 0.7668 0.0060 0.7869 0.036 Uiso 0.438(6) 1 calc PR A 2 
H45B H 0.7999 -0.1069 0.8447 0.036 Uiso 0.438(6) 1 calc PR A 2 
O7 O 0.6405(5) -0.1095(4) 0.5913(4) 0.0108(16) Uiso 0.438(6) 1 d PD A 2 
C47 C 0.8331(7) 0.2437(8) 0.2887(7) 0.034(3) Uiso 0.483(7) 1 d PD A 1 
H47A H 0.8285 0.3104 0.2379 0.040 Uiso 0.483(7) 1 calc PR B 1 
H47B H 0.8578 0.1979 0.2593 0.040 Uiso 0.483(7) 1 calc PR B 1 
C48 C 0.8282(7) 0.2770(7) 0.3267(8) 0.037(3) Uiso 0.517(7) 1 d PD A 2 
H48A H 0.8446 0.3156 0.2583 0.045 Uiso 0.517(7) 1 calc PR B 2 
H48B H 0.8032 0.3241 0.3546 0.045 Uiso 0.517(7) 1 calc PR B 2 
O5 O 0.7156(6) 0.0140(4) 0.3990(4) 0.0213(17) Uiso 0.483(7) 1 d PD A 1 
O6 O 0.6582(7) 0.0374(5) 0.3954(5) 0.039(2) Uiso 0.517(7) 1 d PD A 2 
 
loop_ 
 _atom_site_aniso_label 
 _atom_site_aniso_U_11 
 _atom_site_aniso_U_22 
 _atom_site_aniso_U_33 
 _atom_site_aniso_U_23 
 _atom_site_aniso_U_13 
 _atom_site_aniso_U_12 
C1 0.015(2) 0.021(2) 0.018(2) -0.0083(18) -0.0016(17) -0.0006(17) 
C2 0.015(2) 0.019(2) 0.020(2) -0.0069(18) -0.0014(17) -0.0043(16) 
C3 0.030(3) 0.040(3) 0.029(3) 0.012(2) 0.002(2) 0.003(2) 
C4 0.030(3) 0.024(3) 0.071(4) -0.001(3) -0.019(3) -0.008(2) 
C5 0.021(3) 0.058(4) 0.055(4) 0.010(3) 0.006(3) -0.003(3) 
C6 0.026(3) 0.056(3) 0.034(3) -0.030(3) -0.009(2) 0.005(2) 
C7 0.022(2) 0.030(3) 0.038(3) -0.016(2) -0.009(2) -0.0011(19) 
C8 0.026(3) 0.037(3) 0.024(3) -0.005(2) -0.006(2) -0.003(2) 
C9 0.038(3) 0.056(4) 0.038(3) -0.032(3) -0.017(2) 0.024(3) 
C10 0.050(4) 0.031(3) 0.084(5) -0.038(3) -0.039(3) 0.015(2) 
C11 0.042(3) 0.097(5) 0.043(3) -0.051(4) -0.025(3) 0.040(3) 
C12 0.032(3) 0.073(4) 0.023(3) -0.020(3) 0.003(2) -0.010(3) 
C13 0.030(3) 0.039(3) 0.047(4) 0.017(3) 0.005(3) 0.001(2) 
C14 0.021(2) 0.031(3) 0.035(3) -0.005(2) 0.005(2) -0.005(2) 
C15 0.061(4) 0.074(5) 0.101(5) -0.071(4) 0.030(4) -0.041(3) 
C16 0.026(3) 0.118(6) 0.042(3) -0.044(4) 0.000(2) -0.027(3) 
C17 0.032(3) 0.095(5) 0.043(3) -0.048(3) 0.004(2) -0.022(3) 
C18 0.023(3) 0.035(3) 0.044(3) 0.010(3) -0.002(2) 0.001(2) 
C19 0.034(3) 0.032(3) 0.068(4) -0.031(3) 0.003(3) -0.009(2) 
C20 0.022(3) 0.025(3) 0.059(4) -0.011(3) 0.001(2) 0.003(2) 
C22 0.038(3) 0.042(3) 0.025(3) -0.012(2) 0.005(2) -0.011(2) 
C23 0.069(4) 0.029(3) 0.046(4) -0.021(3) 0.021(3) -0.002(3) 
C24 0.114(6) 0.031(3) 0.036(3) -0.022(3) -0.019(3) 0.024(3) 
C25 0.095(5) 0.020(3) 0.036(3) -0.005(2) -0.016(3) 0.005(3) 
C28 0.058(4) 0.064(4) 0.118(6) -0.069(5) -0.063(4) 0.033(3) 
C29 0.070(6) 0.047(4) 0.228(12) -0.069(6) -0.091(7) 0.022(4) 
C30 0.056(5) 0.291(14) 0.134(8) -0.180(10) 0.061(5) -0.103(7) 
C31 0.102(6) 0.141(8) 0.097(6) -0.102(6) 0.078(5) -0.100(6) 
C34 0.088(5) 0.051(4) 0.026(3) -0.020(3) -0.001(3) -0.024(3) 
C35 0.085(5) 0.041(3) 0.052(4) -0.024(3) -0.030(3) -0.012(3) 
C36 0.065(4) 0.051(4) 0.046(4) -0.029(3) -0.004(3) -0.031(3) 
C37 0.086(5) 0.022(3) 0.040(3) -0.010(2) -0.026(3) -0.010(3) 
N1 0.049(3) 0.026(2) 0.043(3) -0.020(2) -0.030(2) 0.0118(19) 
N2 0.076(4) 0.044(3) 0.029(2) -0.022(2) 0.018(2) -0.032(2) 
O1 0.025(2) 0.023(2) 0.152(5) -0.006(3) -0.018(3) -0.0031(16) 
O2 0.025(2) 0.220(6) 0.049(3) -0.086(4) 0.0095(19) -0.039(3) 
O3 0.037(2) 0.035(2) 0.028(2) -0.0012(16) 0.0030(15) 0.0149(16) 
O4 0.065(3) 0.039(2) 0.027(2) -0.0032(17) 0.0122(18) 0.0248(19) 
Si1 0.0160(6) 0.0272(7) 0.0318(8) 0.0022(6) -0.0001(5) -0.0019(5) 
Si2 0.0171(6) 0.0247(7) 0.0197(6) -0.0108(5) -0.0043(5) -0.0007(5) 
Si3 0.0272(7) 0.0392(8) 0.0296(8) -0.0240(7) -0.0137(6) 0.0158(6) 
Si4 0.0167(6) 0.0279(7) 0.0209(7) -0.0024(6) 0.0005(5) -0.0019(5) 
Si5 0.0233(7) 0.0519(9) 0.0339(8) -0.0283(7) 0.0033(6) -0.0167(6) 
Si6 0.0158(6) 0.0192(6) 0.0307(7) -0.0069(6) -0.0016(5) -0.0004(5) 
K1 0.0201(5) 0.0267(5) 0.0304(6) -0.0181(4) -0.0026(4) -0.0016(4) 
Fe1 0.0140(3) 0.0171(3) 0.0167(3) -0.0068(3) -0.0020(2) -0.0012(2) 
 
_geom_special_details 
; 
 All esds (except the esd in the dihedral angle between two l.s. planes) 
 are estimated using the full covariance matrix.  The cell esds are taken 
 into account individually in the estimation of esds in distances, angles 
 and torsion angles; correlations between esds in cell parameters are only 
 used when they are defined by crystal symmetry.  An approximate (isotropic) 
 treatment of cell esds is used for estimating esds involving l.s. planes. 
; 
 
loop_ 
 _geom_bond_atom_site_label_1 
 _geom_bond_atom_site_label_2 
 _geom_bond_distance 
 _geom_bond_site_symmetry_2 
 _geom_bond_publ_flag 
C1 Si2 1.851(4) . ? 
C1 Si3 1.855(4) . ? 
C1 Si1 1.864(4) . ? 
C1 Fe1 2.062(4) . ? 
C2 Si6 1.854(4) . ? 
C2 Si5 1.858(4) . ? 
C2 Si4 1.859(4) . ? 
C2 Fe1 2.058(4) . ? 
C3 Si1 1.885(5) . ? 
C4 Si1 1.878(6) . ? 
C5 Si1 1.896(5) . ? 
C6 Si2 1.885(5) . ? 
C7 Si2 1.892(4) . ? 
C8 Si2 1.887(5) . ? 
C9 Si3 1.896(5) . ? 
C10 Si3 1.879(6) . ? 
C11 Si3 1.880(5) . ? 
C12 Si4 1.885(5) . ? 
C13 Si4 1.878(5) . ? 
C14 Si4 1.886(5) . ? 
C15 Si5 1.875(6) . ? 
C16 Si5 1.902(5) . ? 
C17 Si5 1.891(5) . ? 
C18 Si6 1.872(5) . ? 
C19 Si6 1.870(5) . ? 
C20 Si6 1.898(5) . ? 
C21 N1 1.345(10) . ? 
C21 C22 1.499(10) . ? 
C22 O4 1.376(6) . ? 
C22 C46 1.435(8) . ? 
C23 O4 1.329(6) . ? 
C23 C24 1.393(7) . ? 
C24 O3 1.337(6) . ? 
C25 C26 1.361(10) . ? 
C25 O3 1.373(6) . ? 
C25 C49 1.533(9) . ? 
C26 N2 1.560(10) . ? 
C49 N2 1.340(9) . ? 
C28 C45 1.324(10) . ? 
C28 O2 1.362(8) . ? 
C28 C44 1.628(9) . ? 
C29 O2 1.322(9) . ? 
C29 C30 1.389(12) . ? 
C30 O1 1.359(10) . ? 
C31 C48 1.291(10) . ? 
C31 O1 1.384(8) . ? 
C31 C47 1.620(11) . ? 
C34 O6 1.381(7) . ? 
C34 O5 1.521(7) . ? 
C34 C43 1.540(9) . ? 
C34 C42 1.580(10) . ? 
C35 O6 1.373(8) . ? 
C35 O5 1.376(7) . ? 
C35 C36 1.421(7) . ? 
C36 O8 1.358(7) . ? 
C36 O7 1.427(7) . ? 
C37 O7 1.387(7) . ? 
C37 O8 1.488(8) . ? 
C37 C39 1.551(8) . ? 
C37 C40 1.553(11) . ? 
N1 C44 1.446(8) . ? 
N1 C40 1.496(11) . ? 
N1 C45 1.504(10) . ? 
N1 C46 1.536(8) . ? 
N1 C39 1.561(8) . ? 
N1 K1 2.962(4) . ? 
N2 C47 1.377(9) . ? 
N2 C43 1.509(9) . ? 
N2 C48 1.514(10) . ? 
N2 C42 1.585(10) . ? 
N2 K1 2.961(4) . ? 
O1 K1 2.815(4) . ? 
O2 K1 2.804(4) . ? 
O3 K1 2.796(3) . ? 
O4 K1 2.787(3) . ? 
K1 O5 2.799(6) . ? 
K1 O8 2.803(6) . ? 
K1 O6 2.885(7) . ? 
K1 O7 2.955(6) . ? 
 
loop_ 
 _geom_angle_atom_site_label_1 
 _geom_angle_atom_site_label_2 
 _geom_angle_atom_site_label_3 
 _geom_angle 
 _geom_angle_site_symmetry_1 
 _geom_angle_site_symmetry_3 
 _geom_angle_publ_flag 
Si2 C1 Si3 112.6(2) . . ? 
Si2 C1 Si1 112.8(2) . . ? 
Si3 C1 Si1 112.5(2) . . ? 
Si2 C1 Fe1 107.32(19) . . ? 
Si3 C1 Fe1 106.1(2) . . ? 
Si1 C1 Fe1 104.75(19) . . ? 
Si6 C2 Si5 112.1(2) . . ? 
Si6 C2 Si4 112.6(2) . . ? 
Si5 C2 Si4 113.3(2) . . ? 
Si6 C2 Fe1 106.92(19) . . ? 
Si5 C2 Fe1 105.82(19) . . ? 
Si4 C2 Fe1 105.34(19) . . ? 
N1 C21 C22 121.3(8) . . ? 
O4 C22 C46 118.1(5) . . ? 
O4 C22 C21 113.9(6) . . ?  
O4 C23 C24 122.0(5) . . ? 
O3 C24 C23 119.9(5) . . ? 
C26 C25 O3 123.8(6) . . ? 
O3 C25 C49 113.4(5) . . ? 
C25 C26 N2 115.9(7) . . ? 
N2 C49 C25 119.0(7) . . ? 
C45 C28 O2 113.6(6) . . ?  
O2 C28 C44 118.3(5) . . ? 
O2 C29 C30 121.0(7) . . ? 
O1 C30 C29 120.3(6) . . ? 
C48 C31 O1 114.3(7) . . ?  
O1 C31 C47 122.2(6) . . ? 
O6 C34 C43 117.6(6) . . ? 
O5 C34 C43 102.0(6) . . ? 
O6 C34 C42 109.2(6) . . ? 
O5 C34 C42 123.6(6) . . ? 
C43 C34 C42 57.0(5) . . ?  
O6 C35 C36 121.8(5) . . ? 
O5 C35 C36 113.0(5) . . ? 
O8 C36 C35 115.8(5) . . ? 
C35 C36 O7 120.4(5) . . ?  
O7 C37 C39 108.4(5) . . ? 
O8 C37 C39 122.9(5) . . ? 
O7 C37 C40 118.7(6) . . ? 
O8 C37 C40 102.5(6) . . ? 
C39 C37 C40 55.6(5) . . ? 
C21 N1 C44 134.8(7) . . ? 
C21 N1 C40 123.8(8) . . ? 
C44 N1 C40 62.6(5) . . ? 
C21 N1 C45 113.7(7) . . ? 
C40 N1 C45 105.6(6) . . ?  
C44 N1 C46 107.9(5) . . ? 
C40 N1 C46 145.3(7) . . ? 
C45 N1 C46 76.2(5) . . ? 
C21 N1 C39 68.2(6) . . ? 
C44 N1 C39 107.8(5) . . ? 
C40 N1 C39 56.5(5) . . ? 
C45 N1 C39 143.9(6) . . ? 
C46 N1 C39 101.3(5) . . ? 
C21 N1 K1 107.8(6) . . ? 
C44 N1 K1 114.3(4) . . ? 
C40 N1 K1 101.9(5) . . ? 
C45 N1 K1 101.1(5) . . ? 
C46 N1 K1 111.8(3) . . ? 
C39 N1 K1 112.8(3) . . ? 
C49 N2 C47 128.4(7) . . ? 
C49 N2 C43 120.6(6) . . ? 
C47 N2 C43 67.1(6) . . ? 
C49 N2 C48 113.7(7) . . ? 
C43 N2 C48 103.7(6) . . ?  
C47 N2 C26 106.5(6) . . ? 
C43 N2 C26 142.3(7) . . ? 
C48 N2 C26 81.6(6) . . ? 
C49 N2 C42 65.3(6) . . ? 
C47 N2 C42 112.3(6) . . ? 
C43 N2 C42 57.4(5) . . ? 
C48 N2 C42 143.6(7) . . ? 
C26 N2 C42 96.2(6) . . ? 
C49 N2 K1 109.8(5) . . ? 
C47 N2 K1 117.8(5) . . ? 
C43 N2 K1 103.1(4) . . ? 
C48 N2 K1 104.3(4) . . ? 
C26 N2 K1 111.7(4) . . ? 
C42 N2 K1 110.2(4) . . ? 
C30 O1 C31 122.8(6) . . ? 
C30 O1 K1 117.7(5) . . ? 
C31 O1 K1 119.5(4) . . ? 
C29 O2 C28 118.9(6) . . ? 
C29 O2 K1 117.5(5) . . ? 
C28 O2 K1 120.5(3) . . ? 
C24 O3 C25 119.2(4) . . ? 
C24 O3 K1 117.0(3) . . ? 
C25 O3 K1 121.4(3) . . ? 
C23 O4 C22 120.3(4) . . ? 
C23 O4 K1 117.9(3) . . ? 
C22 O4 K1 121.8(3) . . ? 
C1 Si1 C4 113.9(2) . . ? 
C1 Si1 C3 114.7(2) . . ? 
C4 Si1 C3 104.0(3) . . ? 
C1 Si1 C5 114.6(2) . . ? 
C4 Si1 C5 103.7(3) . . ? 
C3 Si1 C5 104.7(2) . . ? 
C1 Si2 C6 115.4(2) . . ? 
C1 Si2 C8 113.9(2) . . ? 
C6 Si2 C8 104.0(2) . . ? 
C1 Si2 C7 113.1(2) . . ? 
C6 Si2 C7 105.5(2) . . ? 
C8 Si2 C7 103.8(2) . . ? 
C1 Si3 C10 115.1(2) . . ? 
C1 Si3 C11 114.4(2) . . ? 
C10 Si3 C11 103.8(3) . . ? 
C1 Si3 C9 113.9(2) . . ? 
C10 Si3 C9 104.8(2) . . ? 
C11 Si3 C9 103.6(2) . . ? 
C2 Si4 C13 115.1(2) . . ? 
C2 Si4 C12 114.0(2) . . ? 
C13 Si4 C12 104.1(3) . . ? 
C2 Si4 C14 114.0(2) . . ? 
C13 Si4 C14 104.7(2) . . ? 
C12 Si4 C14 103.7(2) . . ? 
C2 Si5 C15 114.0(3) . . ? 
C2 Si5 C17 114.9(2) . . ? 
C15 Si5 C17 104.3(3) . . ? 
C2 Si5 C16 113.5(2) . . ? 
C15 Si5 C16 103.3(3) . . ? 
C17 Si5 C16 105.7(2) . . ? 
C2 Si6 C19 115.4(2) . . ? 
C2 Si6 C18 114.6(2) . . ? 
C19 Si6 C18 104.6(3) . . ? 
C2 Si6 C20 113.2(2) . . ? 
C19 Si6 C20 104.5(2) . . ? 
C18 Si6 C20 103.1(2) . . ? 
O4 K1 O3 59.71(10) . . ? 
O4 K1 O5 136.32(17) . . ? 
O3 K1 O5 104.92(16) . . ? 
O4 K1 O8 104.56(18) . . ? 
O3 K1 O8 134.00(18) . . ? 
O5 K1 O8 54.36(18) . . ? 
O4 K1 O2 95.23(12) . . ? 
O3 K1 O2 127.08(15) . . ? 
O5 K1 O2 121.99(18) . . ? 
O8 K1 O2 95.3(2) . . ? 
O4 K1 O1 124.19(15) . . ? 
O3 K1 O1 95.04(11) . . ? 
O5 K1 O1 96.09(18) . . ? 
O8 K1 O1 124.93(19) . . ? 
O2 K1 O1 59.41(15) . . ? 
O4 K1 O6 122.81(19) . . ? 
O3 K1 O6 92.18(17) . . ? 
O5 K1 O6 15.01(15) . . ? 
O8 K1 O6 58.55(18) . . ? 
O2 K1 O6 136.85(19) . . ? 
O1 K1 O6 105.46(19) . . ? 
O4 K1 O7 91.82(15) . . ? 
O3 K1 O7 120.54(15) . . ? 
O5 K1 O7 59.34(16) . . ? 
O8 K1 O7 15.01(15) . . ? 
O2 K1 O7 104.63(18) . . ? 
O1 K1 O7 139.86(16) . . ? 
O6 K1 O7 59.02(16) . . ? 
O4 K1 N2 120.01(12) . . ? 
O3 K1 N2 60.31(11) . . ? 
O5 K1 N2 62.68(14) . . ? 
O8 K1 N2 117.02(16) . . ? 
O2 K1 N2 120.09(14) . . ? 
O1 K1 N2 60.72(14) . . ? 
O6 K1 N2 60.34(15) . . ? 
O7 K1 N2 119.34(14) . . ? 
O4 K1 N1 60.10(11) . . ? 
O3 K1 N1 119.76(11) . . ? 
O5 K1 N1 116.23(14) . . ? 
O8 K1 N1 61.87(15) . . ? 
O2 K1 N1 61.05(13) . . ? 
O1 K1 N1 120.44(14) . . ? 
O6 K1 N1 118.39(15) . . ? 
O7 K1 N1 59.38(13) . . ? 
N2 K1 N1 178.66(12) . . ? 
C2 Fe1 C1 179.21(17) . . ? 
C37 C39 N1 106.2(5) . . ? 
C34 C42 N2 104.3(6) . . ? 
N1 C44 C28 109.0(5) . . ? 
C36 O8 C37 111.0(5) . . ? 
C36 O8 K1 123.1(4) . . ? 
C37 O8 K1 117.8(4) . . ? 
C22 C46 N1 113.2(5) . . ? 
N1 C40 C37 109.4(7) . . ? 
N2 C43 C34 110.1(6) . . ? 
C28 C45 N1 124.5(8) . . ? 
C37 O7 C36 113.0(5) . . ? 
C37 O7 K1 113.8(4) . . ? 
C36 O7 K1 111.5(4) . . ? 
N2 C47 C31 111.0(7) . . ? 
C31 C48 N2 123.6(8) . . ? 
C35 O5 C34 106.7(5) . . ? 
C35 O5 K1 121.7(4) . . ? 
C34 O5 K1 115.6(4) . . ? 
C35 O6 C34 115.2(6) . . ? 
C35 O6 K1 116.7(4) . . ? 
C34 O6 K1 116.8(4) . . ? 
 
_diffrn_measured_fraction_theta_max    0.993 
_diffrn_reflns_theta_full              25.00 
_diffrn_measured_fraction_theta_full   0.999 
_refine_diff_density_max    0.734 
_refine_diff_density_min   -0.792 
_refine_diff_density_rms    0.091 

_iucr_refine_instructions_details
;
Significant disorder in the [(2.2.2-cryptand)K]+ moiety required
free variables, as well as geometric restraints to successfully model. 
Modeling of the disorder lead to improved refinement statistics, but 
did not create any significant changes to the [Fe(C(SiMe3)3)2]- moiety.
Light atoms (carbon, oxygen) which were modeled at less than full
occupancy were refined isotropically.


TITL jz168_0ma in P-1
CELL  0.71069  12.8090  15.2710  15.6510   63.410   79.118   77.807
ZERR     2.00   0.0050   0.0050   0.0050    0.005    0.005    0.005
LATT   1
SFAC  C    H    N    O    SI   K    FE
UNIT  80   80   32   20   36   4    4
MERG   2
SADI C39 C37 C37 C40 C34 C42 C34 C43 C44 C28 C45 C28
SADI N1 C39 N1 C40 N2 C42 N2 C43 N1 C44 N1 C45
SADI O7 C37 O8 C37 O7 C36 O8 C36 C35 O6 C35 O5 O5 C34 O6 C34
SADI N1 C46 N1 C21 N2 C47 N2 C48 N2 C26 N2 C49
SADI C46 C22 C21 C22 C47 C31 C48 C31 C26 C25 C25 C49
SADI O7 K1 O8 K1
FMAP   2
PLAN   20
SIZE     0.13   0.15   0.26
ACTA    50.00
LIST   1
L.S.   8
TEMP   100.00
WGHT    0.055500    3.999200
FVAR       0.15142   0.56171   0.48316
C1    1    0.749739    0.366824    0.844859    11.00000    0.01480    0.02100 =
         0.01786   -0.00832   -0.00163   -0.00058
C2    1    1.080419    0.309368    0.821506    11.00000    0.01472    0.01856 =
         0.01970   -0.00691   -0.00144   -0.00433
C3    1    0.786935    0.173030    1.036318    11.00000    0.02964    0.04021 =
         0.02928    0.01177    0.00235    0.00292
AFIX  33
H3A   2    0.758507    0.112549    1.077497    11.00000   -1.50000
H3B   2    0.784122    0.211048    1.071903    11.00000   -1.50000
H3C   2    0.860120    0.158052    1.012743    11.00000   -1.50000
AFIX   0
C4    1    0.708098    0.158295    0.877539    11.00000    0.03027    0.02353 =
         0.07147   -0.00070   -0.01928   -0.00778
AFIX  33
H4A   2    0.683942    0.098252    0.926131    11.00000   -1.50000
H4B   2    0.780273    0.143654    0.851613    11.00000   -1.50000
H4C   2    0.661889    0.187858    0.827112    11.00000   -1.50000
AFIX   0
C5    1    0.561040    0.257315    0.989179    11.00000    0.02083    0.05799 =
         0.05481    0.01046    0.00633   -0.00301
AFIX  33
H5A   2    0.544038    0.192582    1.032837    11.00000   -1.50000
H5B   2    0.513087    0.287558    0.940088    11.00000   -1.50000
H5C   2    0.553309    0.297251    1.023648    11.00000   -1.50000
AFIX   0
C6    1    0.785672    0.342758    0.650756    11.00000    0.02606    0.05588 =
         0.03430   -0.02954   -0.00875    0.00453
AFIX  33
H6A   2    0.758693    0.370448    0.589355    11.00000   -1.50000
H6B   2    0.777460    0.273991    0.684158    11.00000   -1.50000
H6C   2    0.860350    0.349330    0.641632    11.00000   -1.50000
AFIX   0
C7    1    0.561907    0.403221    0.726001    11.00000    0.02241    0.03030 =
         0.03769   -0.01604   -0.00943   -0.00107
AFIX  33
H7A   2    0.544880    0.426835    0.661469    11.00000   -1.50000
H7B   2    0.517458    0.443348    0.755608    11.00000   -1.50000
H7C   2    0.549195    0.335782    0.762121    11.00000   -1.50000
AFIX   0
C8    1    0.721024    0.544583    0.643178    11.00000    0.02588    0.03694 =
         0.02428   -0.00526   -0.00570   -0.00337
AFIX  33
H8A   2    0.698199    0.562245    0.581808    11.00000   -1.50000
H8B   2    0.794602    0.554228    0.634736    11.00000   -1.50000
H8C   2    0.676824    0.585481    0.672057    11.00000   -1.50000
AFIX   0
C9    1    0.571283    0.531452    0.871815    11.00000    0.03781    0.05597 =
         0.03804   -0.03157   -0.01725    0.02421
AFIX  33
H9A   2    0.557559    0.579833    0.897449    11.00000   -1.50000
H9B   2    0.520621    0.485376    0.903750    11.00000   -1.50000
H9C   2    0.564084    0.563938    0.804217    11.00000   -1.50000
AFIX   0
C10   1    0.801044    0.562381    0.839106    11.00000    0.05019    0.03143 =
         0.08376   -0.03843   -0.03934    0.01542
AFIX  33
H10A  2    0.776195    0.608569    0.867177    11.00000   -1.50000
H10B  2    0.798481    0.596309    0.770839    11.00000   -1.50000
H10C  2    0.873621    0.533183    0.852465    11.00000   -1.50000
AFIX   0
C11   1    0.715491    0.413626    1.024978    11.00000    0.04225    0.09705 =
         0.04279   -0.05133   -0.02487    0.04042
AFIX  33
H11A  2    0.695633    0.467358    1.043637    11.00000   -1.50000
H11B  2    0.786590    0.381571    1.041259    11.00000   -1.50000
H11C  2    0.665693    0.366871    1.058121    11.00000   -1.50000
AFIX   0
C12   1    1.118188    0.324052    0.611654    11.00000    0.03181    0.07333 =
         0.02258   -0.01996    0.00321   -0.01030
AFIX  33
H12A  2    1.142462    0.365990    0.546730    11.00000   -1.50000
H12B  2    1.045348    0.315024    0.615011    11.00000   -1.50000
H12C  2    1.163174    0.260972    0.631820    11.00000   -1.50000
AFIX   0
C13   1    1.046581    0.510096    0.636291    11.00000    0.02974    0.03917 =
         0.04742    0.01703    0.00497    0.00105
AFIX  33
H13A  2    1.075081    0.542839    0.570336    11.00000   -1.50000
H13B  2    1.051876    0.547830    0.670178    11.00000   -1.50000
H13C  2    0.972587    0.504439    0.639391    11.00000   -1.50000
AFIX   0
C14   1    1.269533    0.405085    0.669712    11.00000    0.02141    0.03055 =
         0.03517   -0.00500    0.00459   -0.00503
AFIX  33
H14A  2    1.287087    0.443554    0.602240    11.00000   -1.50000
H14B  2    1.315727    0.342651    0.690224    11.00000   -1.50000
H14C  2    1.279237    0.440137    0.704839    11.00000   -1.50000
AFIX   0
C15   1    1.117656    0.487434    0.854855    11.00000    0.06062    0.07389 =
         0.10101   -0.07083    0.02964   -0.04095
AFIX  33
H15A  2    1.139703    0.503084    0.901112    11.00000   -1.50000
H15B  2    1.045915    0.519952    0.841493    11.00000   -1.50000
H15C  2    1.165565    0.509540    0.796647    11.00000   -1.50000
AFIX   0
C16   1    1.265127    0.299070    0.933899    11.00000    0.02640    0.11789 =
         0.04206   -0.04438   -0.00027   -0.02711
AFIX  33
H16A  2    1.281305    0.322824    0.976577    11.00000   -1.50000
H16B  2    1.313242    0.320524    0.875771    11.00000   -1.50000
H16C  2    1.273526    0.228077    0.964290    11.00000   -1.50000
AFIX   0
C17   1    1.035666    0.316611    1.024036    11.00000    0.03192    0.09510 =
         0.04268   -0.04764    0.00413   -0.02186
AFIX  33
H17A  2    1.062066    0.340279    1.062149    11.00000   -1.50000
H17B  2    1.038951    0.246008    1.057081    11.00000   -1.50000
H17C  2    0.962587    0.346521    1.013664    11.00000   -1.50000
AFIX   0
C18   1    1.106692    0.097707    0.991867    11.00000    0.02276    0.03474 =
         0.04356    0.01024   -0.00209    0.00068
AFIX  33
H18A  2    1.127852    0.029073    1.005125    11.00000   -1.50000
H18B  2    1.033623    0.107662    1.018441    11.00000   -1.50000
H18C  2    1.152612    0.117094    1.020283    11.00000   -1.50000
AFIX   0
C19   1    1.040056    0.117717    0.812051    11.00000    0.03371    0.03162 =
         0.06784   -0.03058    0.00328   -0.00855
AFIX  33
H19A  2    1.065256    0.048061    0.834887    11.00000   -1.50000
H19B  2    1.049440    0.148241    0.743065    11.00000   -1.50000
H19C  2    0.965273    0.127790    0.834213    11.00000   -1.50000
AFIX   0
C20   1    1.264056    0.138341    0.819277    11.00000    0.02218    0.02489 =
         0.05876   -0.01097    0.00107    0.00281
AFIX  33
H20A  2    1.279014    0.067879    0.840576    11.00000   -1.50000
H20B  2    1.310041    0.158654    0.846813    11.00000   -1.50000
H20C  2    1.276805    0.170287    0.750459    11.00000   -1.50000
AFIX   0
PART    2
C21   1    0.608108   -0.058876    0.783529   -21.00000    0.04256
AFIX  23
H21A  2    0.608756   -0.099937    0.851985   -21.00000   -1.20000
H21B  2    0.560177   -0.083604    0.761091   -21.00000   -1.20000
AFIX   0
PART    0
C22   1    0.557473    0.043308    0.771635    11.00000    0.03809    0.04169 =
         0.02457   -0.01187    0.00530   -0.01069
PART    1
AFIX  23
H22A  2    0.499366    0.010943    0.772789    21.00000   -1.20000
H22B  2    0.532400    0.075894    0.814117    21.00000   -1.20000
PART    2
H22C  2    0.480580    0.044603    0.789343   -21.00000   -1.20000
H22D  2    0.585751    0.059286    0.815416   -21.00000   -1.20000
AFIX   0
PART    0
C23   1    0.520062    0.205768    0.654528    11.00000    0.06944    0.02939 =
         0.04595   -0.02051    0.02089   -0.00155
AFIX  23
H23A  2    0.535169    0.231280    0.696910    11.00000   -1.20000
H23B  2    0.444562    0.198204    0.669291    11.00000   -1.20000
AFIX   0
C24   1    0.532601    0.279592    0.561283    11.00000    0.11352    0.03071 =
         0.03623   -0.02189   -0.01918    0.02358
AFIX  23
H24A  2    0.461508    0.313821    0.544016    11.00000   -1.20000
H24B  2    0.571093    0.326977    0.563023    11.00000   -1.20000
AFIX   0
C25   1    0.586731    0.328061    0.397197    11.00000    0.09487    0.02014 =
         0.03627   -0.00470   -0.01639    0.00541
PART    1
AFIX  23
H25A  2    0.523220    0.328837    0.371383    31.00000   -1.20000
H25B  2    0.578079    0.390515    0.401799    31.00000   -1.20000
PART    2
H25C  2    0.625877    0.378100    0.392722   -31.00000   -1.20000
H25D  2    0.514194    0.359491    0.382359   -31.00000   -1.20000
AFIX   0
PART    1
C26   1    0.670649    0.329912    0.328819    31.00000    0.03811
AFIX  23
H26A  2    0.721054    0.368333    0.330412    31.00000   -1.20000
H26B  2    0.643743    0.364289    0.266377    31.00000   -1.20000
AFIX   0
PART    2
C49   1    0.639979    0.288793    0.322355   -31.00000    0.03180
AFIX  23
H49A  2    0.588693    0.255345    0.314173   -31.00000   -1.20000
H49B  2    0.651891    0.345493    0.261615   -31.00000   -1.20000
AFIX   0
PART    0
C28   1    0.893931   -0.046863    0.738290    11.00000    0.05752    0.06443 =
         0.11754   -0.06910   -0.06275    0.03279
PART    1
AFIX  23
H28A  2    0.875607   -0.009166    0.776448    21.00000   -1.20000
H28B  2    0.965127   -0.083615    0.751596    21.00000   -1.20000
PART    2
H28C  2    0.929970   -0.111302    0.743232   -21.00000   -1.20000
H28F  2    0.931967   -0.026190    0.772599   -21.00000   -1.20000
AFIX   0
PART    0
C29   1    0.975134    0.076995    0.609758    11.00000    0.06960    0.04658 =
         0.22750   -0.06862   -0.09053    0.02152
AFIX  23
H29A  2    1.043151    0.034792    0.626498    11.00000   -1.20000
H29B  2    0.961805    0.117696    0.644787    11.00000   -1.20000
AFIX   0
C30   1    0.989509    0.139995    0.512695    11.00000    0.05575    0.29110 =
         0.13444   -0.17954    0.06074   -0.10271
AFIX  23
H30A  2    1.006942    0.200925    0.507961    11.00000   -1.20000
H30B  2    1.052371    0.110168    0.484533    11.00000   -1.20000
AFIX   0
C31   1    0.918628    0.229586    0.359632    11.00000    0.10209    0.14084 =
         0.09729   -0.10159    0.07831   -0.09964
PART    1
AFIX  23
H31A  2    0.988890    0.209973    0.332076    31.00000   -1.20000
H31B  2    0.919475    0.294531    0.356009    31.00000   -1.20000
PART    2
H31C  2    0.963852    0.277633    0.349628   -31.00000   -1.20000
H31D  2    0.954429    0.192318    0.323197   -31.00000   -1.20000
AFIX   0
PART    0
C34   1    0.691684    0.095849    0.300891    11.00000    0.08832    0.05065 =
         0.02583   -0.02000   -0.00088   -0.02400
PART    1
AFIX  23
H34A  2    0.635503    0.077310    0.281199    31.00000   -1.20000
H34B  2    0.755446    0.092966    0.257001    31.00000   -1.20000
PART    2
H34C  2    0.620803    0.133848    0.288785   -31.00000   -1.20000
H34D  2    0.711968    0.063475    0.257948   -31.00000   -1.20000
AFIX   0
PART    0
C35   1    0.658334   -0.060119    0.416328    11.00000    0.08475    0.04128 =
         0.05214   -0.02420   -0.03028   -0.01228
PART    1
AFIX  23
H35A  2    0.688357   -0.089858    0.372082    31.00000   -1.20000
H35B  2    0.584567   -0.031475    0.403851    31.00000   -1.20000
PART    2
H35C  2    0.720571   -0.079076    0.378876   -31.00000   -1.20000
H35D  2    0.595541   -0.062835    0.391802   -31.00000   -1.20000
AFIX   0
PART    0
C36   1    0.659167   -0.135132    0.511951    11.00000    0.06502    0.05093 =
         0.04603   -0.02924   -0.00435   -0.03094
PART    1
AFIX  23
H36A  2    0.585950   -0.147666    0.537296    21.00000   -1.20000
H36B  2    0.700058   -0.195529    0.510015    21.00000   -1.20000
PART    2
H36C  2    0.728079   -0.177181    0.515931   -21.00000   -1.20000
H36D  2    0.604917   -0.175293    0.521408   -21.00000   -1.20000
AFIX   0
PART    0
C37   1    0.675212   -0.186830    0.675029    11.00000    0.08649    0.02179 =
         0.04022   -0.01000   -0.02566   -0.00972
PART    1
AFIX  23
H37A  2    0.739017   -0.235453    0.692683    21.00000   -1.20000
H37B  2    0.620145   -0.221397    0.674394    21.00000   -1.20000
PART    2
H37C  2    0.709990   -0.241754    0.659734   -21.00000   -1.20000
H37D  2    0.611830   -0.207758    0.719343   -21.00000   -1.20000
AFIX   0
PART    0
N1    3    0.707446   -0.075543    0.741732    11.00000    0.04889    0.02640 =
         0.04330   -0.01978   -0.03029    0.01175
N2    3    0.732933    0.227063    0.338200    11.00000    0.07610    0.04396 =
         0.02921   -0.02245    0.01810   -0.03213
O1    4    0.909657    0.165270    0.456183    11.00000    0.02486    0.02269 =
         0.15237   -0.00575   -0.01822   -0.00314
O2    4    0.899932    0.018705    0.643939    11.00000    0.02493    0.21951 =
         0.04880   -0.08566    0.00947   -0.03948
O3    4    0.582451    0.255757    0.489816    11.00000    0.03654    0.03478 =
         0.02833   -0.00119    0.00301    0.01493
O4    4    0.575298    0.115389    0.679878    11.00000    0.06465    0.03920 =
         0.02689   -0.00320    0.01221    0.02484
SI1   5    0.704556    0.246565    0.931850    11.00000    0.01603    0.02719 =
         0.03175    0.00217   -0.00012   -0.00194
SI2   5    0.708140    0.410508    0.723644    11.00000    0.01710    0.02466 =
         0.01970   -0.01083   -0.00433   -0.00072
SI3   5    0.712661    0.462742    0.891622    11.00000    0.02720    0.03924 =
         0.02958   -0.02404   -0.01371    0.01578
SI4   5    1.125218    0.383299    0.692958    11.00000    0.01671    0.02786 =
         0.02093   -0.00243    0.00054   -0.00194
SI5   5    1.121140    0.350146    0.904305    11.00000    0.02332    0.05193 =
         0.03388   -0.02834    0.00327   -0.01667
SI6   5    1.118371    0.174329    0.858782    11.00000    0.01584    0.01916 =
         0.03065   -0.00688   -0.00157   -0.00044
K1    6    0.721917    0.076886    0.540471    11.00000    0.02014    0.02668 =
         0.03042   -0.01813   -0.00264   -0.00163
FE1   7    0.915212    0.337385    0.832788    11.00000    0.01401    0.01705 =
         0.01671   -0.00682   -0.00198   -0.00116
PART    1
C39   1    0.637570   -0.155326    0.758673    21.00000    0.02589
AFIX  23
H39A  2    0.648103   -0.211721    0.819996    21.00000   -1.20000
H39B  2    0.561999   -0.127940    0.758392    21.00000   -1.20000
AFIX   0
C42   1    0.657086    0.208411    0.280665    31.00000    0.04257
AFIX  23
H42A  2    0.582142    0.220716    0.303738    31.00000   -1.20000
H42B  2    0.667928    0.250777    0.212468    31.00000   -1.20000
AFIX   0
C44   1    0.810153   -0.126585    0.776476    21.00000    0.02464
AFIX  23
H44A  2    0.837492   -0.177166    0.753226    21.00000   -1.20000
H44B  2    0.801935   -0.158441    0.846174    21.00000   -1.20000
AFIX   0
O8    4    0.700619   -0.115117    0.573924    21.00000    0.04868
C46   1    0.645411   -0.032128    0.811420    21.00000    0.02309
AFIX  23
H46A  2    0.618007   -0.085041    0.869278    21.00000   -1.20000
H46B  2    0.694526   -0.004467    0.829509    21.00000   -1.20000
AFIX   0
PART    2
C40   1    0.751832   -0.168590    0.729533   -21.00000    0.04686
AFIX  23
H40A  2    0.758865   -0.224051    0.791993   -21.00000   -1.20000
H40B  2    0.822500   -0.162744    0.693572   -21.00000   -1.20000
AFIX   0
C43   1    0.772753    0.165554    0.282183   -31.00000    0.03649
AFIX  23
H43A  2    0.841783    0.126926    0.301307   -31.00000   -1.20000
H43B  2    0.782285    0.208668    0.214087   -31.00000   -1.20000
AFIX   0
C45   1    0.794284   -0.055090    0.780110   -21.00000    0.03017
AFIX  23
H45A  2    0.766778    0.005992    0.786873   -21.00000   -1.20000
H45B  2    0.799861   -0.106948    0.844701   -21.00000   -1.20000
AFIX   0
O7    4    0.640488   -0.109453    0.591294   -21.00000    0.01078
PART    1
C47   1    0.833118    0.243667    0.288708    31.00000    0.03370
AFIX  23
H47A  2    0.828528    0.310364    0.237863    31.00000   -1.20000
H47B  2    0.857786    0.197857    0.259307    31.00000   -1.20000
AFIX   0
PART    2
C48   1    0.828239    0.277025    0.326736   -31.00000    0.03743
AFIX  23
H48A  2    0.844595    0.315570    0.258286   -31.00000   -1.20000
H48B  2    0.803210    0.324128    0.354595   -31.00000   -1.20000
AFIX   0
PART    1
O5    4    0.715609    0.013998    0.399011    31.00000    0.02135
PART    2
O6    4    0.658174    0.037368    0.395352   -31.00000    0.03901
HKLF    4
 
REM  jz168_0ma in P-1
REM R1 =  0.0622 for   7215 Fo > 4sig(Fo)  and  0.0967 for all  10551 data
REM    481 parameters refined using     89 restraints
 
END  
     
WGHT      0.0556      4.0114 
REM Highest difference peak  0.734,  deepest hole -0.792,  1-sigma level  0.091
Q1    1   0.7375 -0.1117  0.5494  11.00000  0.05    0.73
Q2    1   0.8636  0.2687  0.3460  11.00000  0.05    0.71
Q3    1   0.9127 -0.0131  0.6570  11.00000  0.05    0.70
Q4    1   0.9018  0.0696  0.6333  11.00000  0.05    0.66
Q5    1   0.9610  0.1865  0.4908  11.00000  0.05    0.61
Q6    1   0.4753  0.2159  0.7098  11.00000  0.05    0.58
Q7    1   0.7238  0.1607  0.2858  11.00000  0.05    0.58
Q8    1   0.4954  0.3466  0.5436  11.00000  0.05    0.55
Q9    1   0.7802 -0.1462  0.7911  11.00000  0.05    0.55
Q10   1   0.8279 -0.0409  0.7649  11.00000  0.05    0.55
Q11   1   0.9206  0.1571  0.4888  11.00000  0.05    0.53
Q12   1   0.8198  0.1612  0.2809  11.00000  0.05    0.51
Q13   1   0.6621  0.3483  0.3412  11.00000  0.05    0.50
Q14   1   0.9421  0.2156  0.3942  11.00000  0.05    0.50
Q15   1   0.9964  0.1122  0.5512  11.00000  0.05    0.50
Q16   1   1.0529  0.0531  0.5199  11.00000  0.05    0.49
Q17   1   0.9976  0.0572  0.5812  11.00000  0.05    0.49
Q18   1   0.6780  0.2812  0.3194  11.00000  0.05    0.48
Q19   1   0.6524 -0.0770  0.3608  11.00000  0.05    0.48
Q20   1   0.6571 -0.1366  0.6127  11.00000  0.05    0.47
;
