# Supplementary material for: Magnetic blocking in a linear iron(I) complex
Source: Springer Nature journal article supplement (doi:10.1038/nchem.1630), 2013-05-03
Supplement: 41557_2013_BFnchem1630_MOESM2_ESM.mol [file 41557_2013_BFnchem1630_MOESM2_ESM.mol]

  ChemDraw04161306002D

 54 51  0  0  0  0  0  0  0  0999 V2000
    0.1631    2.4517    0.0000 K   0  3  0  0  0  0  0  0  0  0  0  0
   -2.7321    2.5345    0.0000 N   0  0  0  0  0  0  0  0  0  0  0  0
   -2.3182    3.2514    0.0000 C   0  0  0  0  0  0  0  0  0  0  0  0
   -1.5186    3.4656    0.0000 C   0  0  0  0  0  0  0  0  0  0  0  0
   -0.8017    3.0517    0.0000 O   0  0  0  0  0  0  0  0  0  0  0  0
   -0.0848    3.4656    0.0000 C   0  0  0  0  0  0  0  0  0  0  0  0
    0.7429    3.4656    0.0000 C   0  0  0  0  0  0  0  0  0  0  0  0
    1.4598    3.0517    0.0000 O   0  0  0  0  0  0  0  0  0  0  0  0
    2.0276    3.4251    0.0000 C   0  0  0  0  0  0  0  0  0  0  0  0
    2.8242    3.2002    0.0000 C   0  0  0  0  0  0  0  0  0  0  0  0
    2.8936    2.6378    0.0000 N   0  0  0  0  0  0  0  0  0  0  0  0
    2.6588    2.1598    0.0000 C   0  0  0  0  0  0  0  0  0  0  0  0
    1.8592    1.9456    0.0000 C   0  0  0  0  0  0  0  0  0  0  0  0
    1.3631    2.1387    0.0000 O   0  0  0  0  0  0  0  0  0  0  0  0
    0.6462    1.8628    0.0000 C   0  0  0  0  0  0  0  0  0  0  0  0
   -0.1816    1.8628    0.0000 C   0  0  0  0  0  0  0  0  0  0  0  0
   -0.8984    2.1387    0.0000 O   0  0  0  0  0  0  0  0  0  0  0  0
   -1.4110    1.9033    0.0000 C   0  0  0  0  0  0  0  0  0  0  0  0
   -2.2076    2.1283    0.0000 C   0  0  0  0  0  0  0  0  0  0  0  0
    2.8520    1.6907    0.0000 C   0  0  0  0  0  0  0  0  0  0  0  0
    2.0524    1.4765    0.0000 C   0  0  0  0  0  0  0  0  0  0  0  0
    1.4459    1.4765    0.0000 O   0  0  0  0  0  0  0  0  0  0  0  0
    0.7290    1.2006    0.0000 C   0  0  0  0  0  0  0  0  0  0  0  0
   -0.0988    1.2006    0.0000 C   0  0  0  0  0  0  0  0  0  0  0  0
   -0.8157    1.4765    0.0000 O   0  0  0  0  0  0  0  0  0  0  0  0
   -1.4938    1.4067    0.0000 C   0  0  0  0  0  0  0  0  0  0  0  0
   -2.2904    1.6316    0.0000 C   0  0  0  0  0  0  0  0  0  0  0  0
    1.0879   -1.8849    0.0000 C   0  5  0  0  0  0  0  0  0  0  0  0
    1.3246   -2.6753    0.0000 Si  0  0  0  0  0  0  0  0  0  0  0  0
    0.7584   -3.2754    0.0000 C   0  0  0  0  0  0  0  0  0  0  0  0
    1.5612   -3.4656    0.0000 C   0  0  0  0  0  0  0  0  0  0  0  0
    2.1273   -2.8655    0.0000 C   0  0  0  0  0  0  0  0  0  0  0  0
    1.9074   -1.7892    0.0000 Si  0  0  0  0  0  0  0  0  0  0  0  0
    2.4000   -2.4509    0.0000 C   0  0  0  0  0  0  0  0  0  0  0  0
    2.7268   -1.6934    0.0000 C   0  0  0  0  0  0  0  0  0  0  0  0
    2.2341   -1.0316    0.0000 C   0  0  0  0  0  0  0  0  0  0  0  0
    1.1359   -1.0613    0.0000 Si  0  0  0  0  0  0  0  0  0  0  0  0
    1.2792   -0.2489    0.0000 C   0  0  0  0  0  0  0  0  0  0  0  0
    0.5358   -0.4952    0.0000 C   0  0  0  0  0  0  0  0  0  0  0  0
    1.8934   -0.7346    0.0000 C   0  0  0  0  0  0  0  0  0  0  0  0
   -1.2547   -1.8849    0.0000 C   0  5  0  0  0  0  0  0  0  0  0  0
   -1.3027   -1.0613    0.0000 Si  0  0  0  0  0  0  0  0  0  0  0  0
   -0.7026   -0.4952    0.0000 C   0  0  0  0  0  0  0  0  0  0  0  0
   -1.4460   -0.2489    0.0000 C   0  0  0  0  0  0  0  0  0  0  0  0
   -2.0602   -0.7346    0.0000 C   0  0  0  0  0  0  0  0  0  0  0  0
   -2.0742   -1.7892    0.0000 Si  0  0  0  0  0  0  0  0  0  0  0  0
   -2.4009   -1.0316    0.0000 C   0  0  0  0  0  0  0  0  0  0  0  0
   -2.8936   -1.6934    0.0000 C   0  0  0  0  0  0  0  0  0  0  0  0
   -2.5668   -2.4509    0.0000 C   0  0  0  0  0  0  0  0  0  0  0  0
   -1.4914   -2.6753    0.0000 Si  0  0  0  0  0  0  0  0  0  0  0  0
   -1.7280   -3.4656    0.0000 C   0  0  0  0  0  0  0  0  0  0  0  0
   -0.9252   -3.2754    0.0000 C   0  0  0  0  0  0  0  0  0  0  0  0
   -2.2941   -2.8655    0.0000 C   0  0  0  0  0  0  0  0  0  0  0  0
   -0.3695   -1.8849    0.0000 Fe  0  3  0  0  0  0  0  0  0  0  0  0
  2  3  1  0      
  3  4  1  0      
  4  5  1  0      
  5  6  1  0      
  6  7  1  0      
  7  8  1  0      
  8  9  1  0      
  9 10  1  0      
 10 11  1  0      
 12 13  1  0      
 13 14  1  0      
 14 15  1  0      
 15 16  1  0      
 16 17  1  0      
 17 18  1  0      
 18 19  1  0      
 20 21  1  0      
 21 22  1  0      
 22 23  1  0      
 23 24  1  0      
 24 25  1  0      
 25 26  1  0      
 26 27  1  0      
  2 19  1  6      
 11 12  1  6      
  2 27  1  1      
 11 20  1  1      
 28 29  1  0      
 28 33  1  0      
 28 37  1  0      
 29 30  1  0      
 29 31  1  0      
 29 32  1  0      
 33 34  1  0      
 33 35  1  0      
 33 36  1  0      
 37 38  1  0      
 37 39  1  0      
 37 40  1  0      
 41 42  1  0      
 41 46  1  0      
 41 50  1  0      
 42 43  1  0      
 42 44  1  0      
 42 45  1  0      
 46 47  1  0      
 46 48  1  0      
 46 49  1  0      
 50 51  1  0      
 50 52  1  0      
 50 53  1  0      
M  CHG  4   1   1  28  -1  41  -1  54   1
M  END
